# Supplementary material
Source: bioRxiv or medRxiv preprint supplement (https://www.medrxiv.org/highwire/filestream/78702/field_highwire_adjunct_files/0/2020.04.26.20077529-1.pdf)
Supplement: Supplementary file [file 2020.04.26.20077529-1.pdf]

## Supplementary Materials

**Table S1. Stroke Etiology and Lesion Location of Study Participants**

| Patient I.D. | Stroke Type & Location                                                                                    |
|--------------|-----------------------------------------------------------------------------------------------------------|
| P1           | Left frontal and parietal lobes hemorrhagic infarcts                                                      |
| P2           | Right superior temporal gyrus, inferior and middle frontal gyri, right precentral gyrus ischemic infarcts |
| P3           | Right thalamocapsular and left posterior thalamus and left posterior putamen ischemic infarcts            |
| P4           | Right frontal, parietal and occipital lobes ischemic infarcts                                             |
| P5           | Left corona radiata and putamen, left cerebral peduncle ischemic infarcts                                 |
| P6           | Left frontal lobe and left basal ganglia hemorrhagic infarcts                                             |
| P7           | Left insula, putamen and external capsule hemorrhagic infarcts                                            |
| P8           | Right frontal lobe ischemic infarct                                                                       |
| P9           | Right external capsule ischemic infarct                                                                   |
| P10          | Left basilar part of pons hemorrhagic infarct                                                             |

**Table S2. No. of participants achieving MCID with respect to baseline**

| Assessments       | Post-treatment | 2-weeks | 2-months | <b>Overall</b>                             |
|-------------------|----------------|---------|----------|--------------------------------------------|
| FMA-UE            | 2              | 4       | 4        | <b>8</b> (P1, P3, P5, P6, P7, P8, P9, P10) |
| ARAT              | 5              | 5       | 3        |                                            |
| <b># Assessed</b> | 10             | 7       | 9        | <b>10</b>                                  |

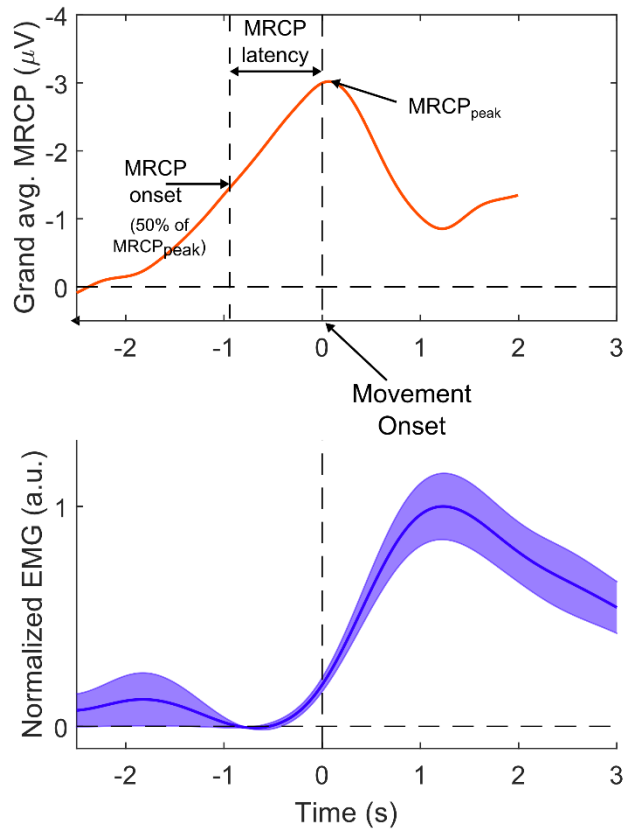

Fig. S1. (Top row) MRCP latency defined as the time difference between MRCP onset and movement onset. MRCP onset is taken as time point corresponding to 50% of grand averaged MRCP peak amplitude. (Bottom row) Normalized EMG activity (mean  $\pm$  95% C.I.) of impaired arm muscles used to identify movement onset (see Methods section for details) shown for an example participant.

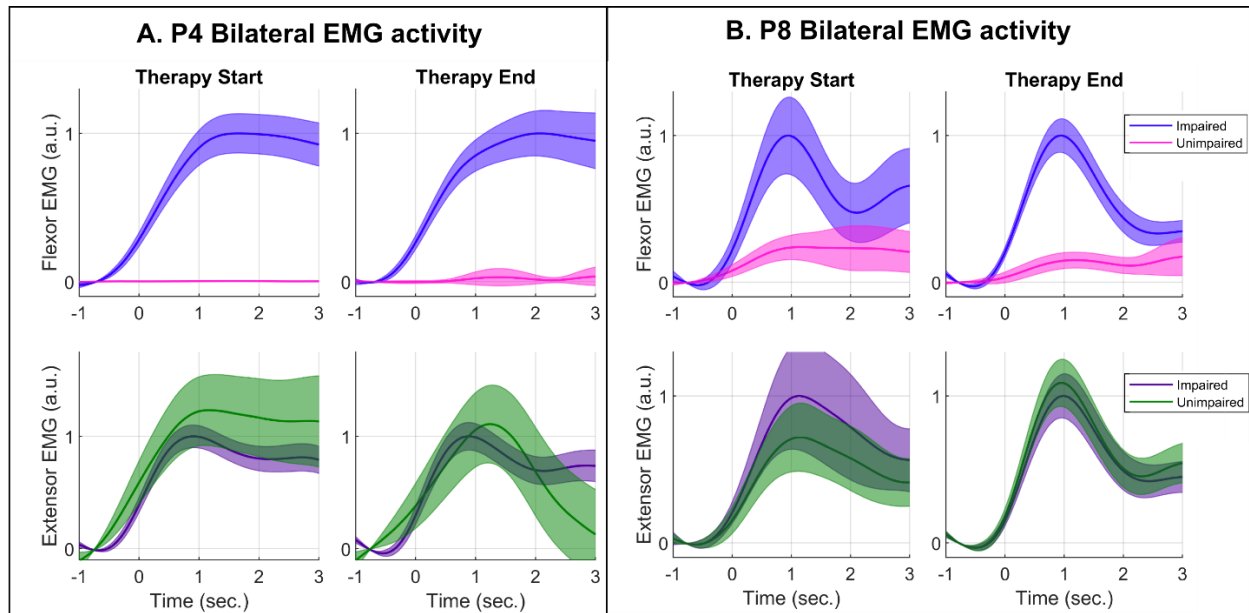

Fig. S2. Normalized EMG traces (mean  $\pm$  95% C.I.) showing presence of global synkinesis in 2 of 10 study participants (P4 and P8) at start and end of therapy. Time ( $t = 0$ s) corresponds to voluntary movement onset of the impaired arm.
